# Supplementary material for: Transparent conductive graphene textile fibers
Source: PubMed Central journal article supplement (PMC4424659; doi:10.1038/srep09866), 2015-05-08
Supplement: srep09866-s1.pdf [file srep09866-s1.pdf]

## Supplementary Information for

### **Transparent conductive graphene textile fibers**

A. I. S. Neves<sup>1</sup>, T. H. Bointon<sup>2</sup>, L. V. Melo<sup>1,3</sup>, S. Russo<sup>2</sup>, I. de Schrijver<sup>4</sup>, M. F. Craciun<sup>2</sup>  
& H. Alves<sup>1,5\*</sup>

<sup>1</sup> INESC-MN and IN, Rua Alves Redol nº9, 1000-029 Lisboa, Portugal.

<sup>2</sup> Centre for Graphene Science, College of Engineering, Mathematics & Physical Sciences, University of Exeter, EX4 4QL, United Kingdom.

<sup>3</sup> Physics Department, IST, University of Lisbon, Av. Rovisco Pais 1, 1049-001 Lisboa, Portugal.

<sup>4</sup> CenTexBel, Technologiepark-Zwijnaarde 7, 9052 Gent, Belgium.

<sup>5</sup> Department of Chemistry, CICECO, University of Aveiro, 3810-193 Aveiro, Portugal.

\* email: halves@inesc-mn.pt; alves.helena@ua.pt.

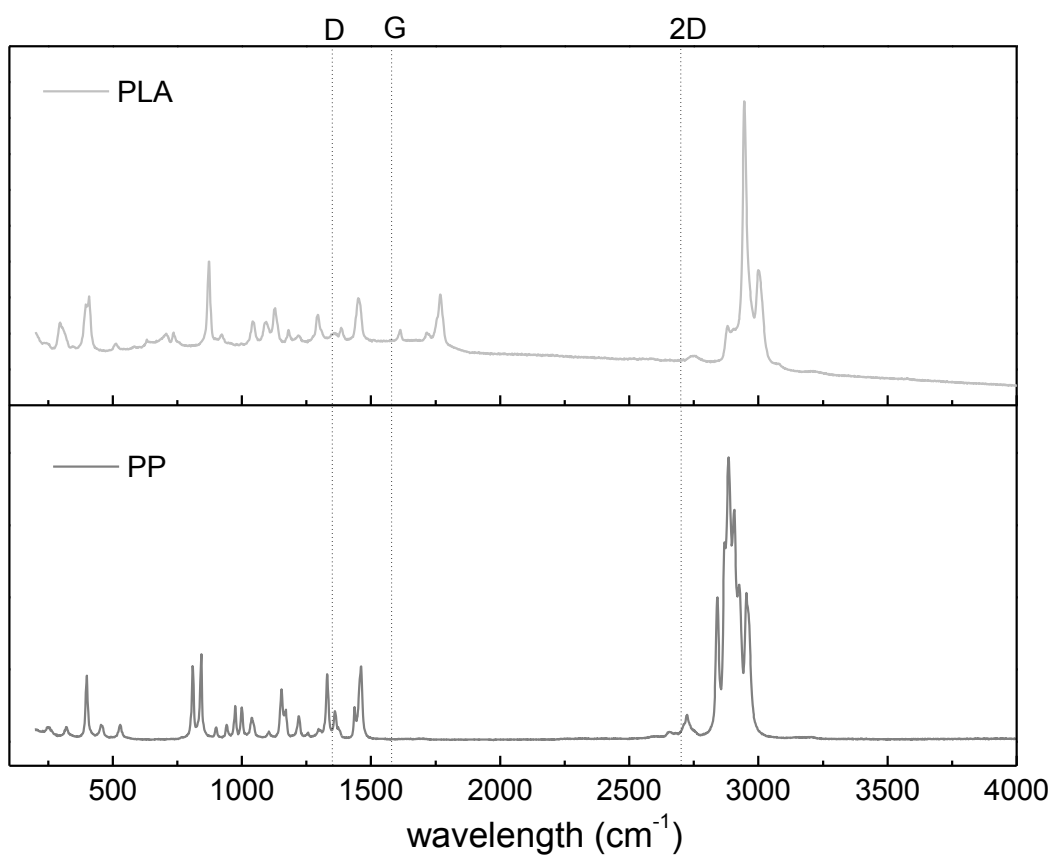

**Figure S1.** Raman spectra of the fibers without the graphene: PLA (top, light gray) and PP (bottom, dark gray) showing the whole wavelength range. Dotted vertical lines indicate the expected positions of graphene peaks D (1350 cm<sup>-1</sup>), G (1580 cm<sup>-1</sup>) and 2D (2700 cm<sup>-1</sup>).

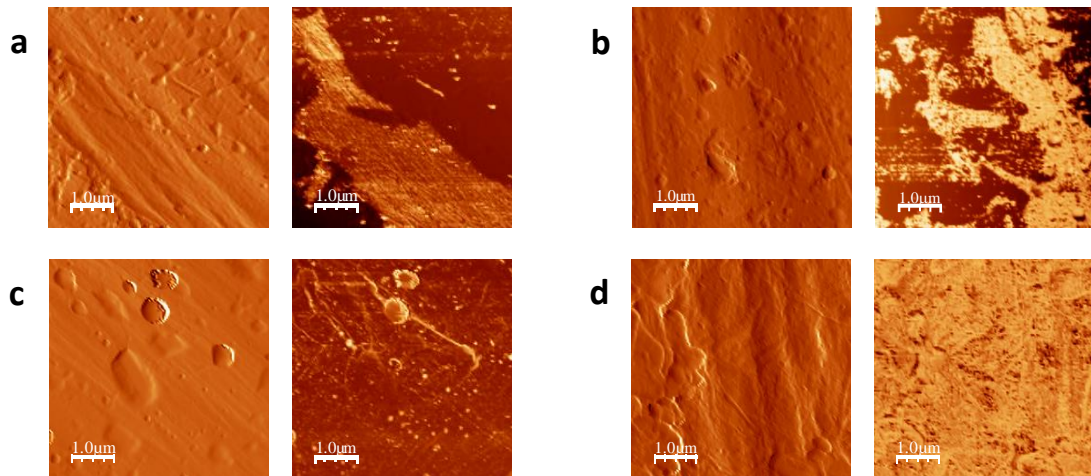

**Figure S2.** AFM amplitude and phase images for (a) PP+G, (b) PLA+G, (c) PP UV+G and (d) PLA UV+G. Two very different types of surface are visible in the phase AFM image on the non-UV-treated fibers (a) and (b), while a continuous coverage is achieved in the UV-treated fibers (c) and (d). Tapping mode amplitude is the tip oscillation amplitude while scanning, representing in fact a spatial derivative of the topography. The phase image represents the phase difference between the tip excitation signal and the tip oscillation and is sensitive to the tip-surface interaction.

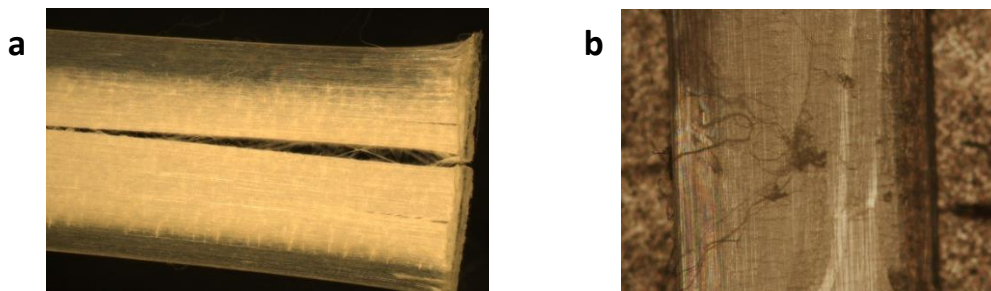

**Figure S3.** Detail of the damages on the PLA fiber: (a) split fiber; (b) loose microfibrils on the surface.

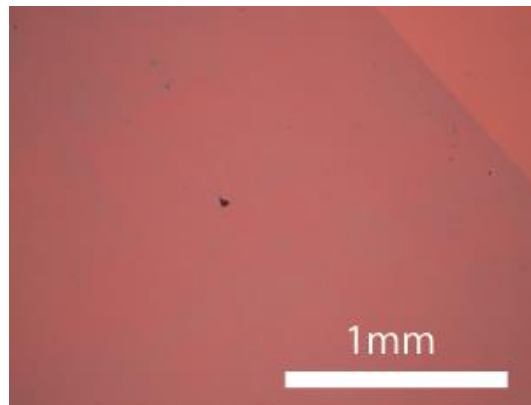

**Figure S4.** Optical microscope image of CVD graphene transferred onto an SiO<sub>2</sub>/Si substrate via standard PMMA-assisted techniques. The edge of the film is shown to give contrast with the underlying substrate.

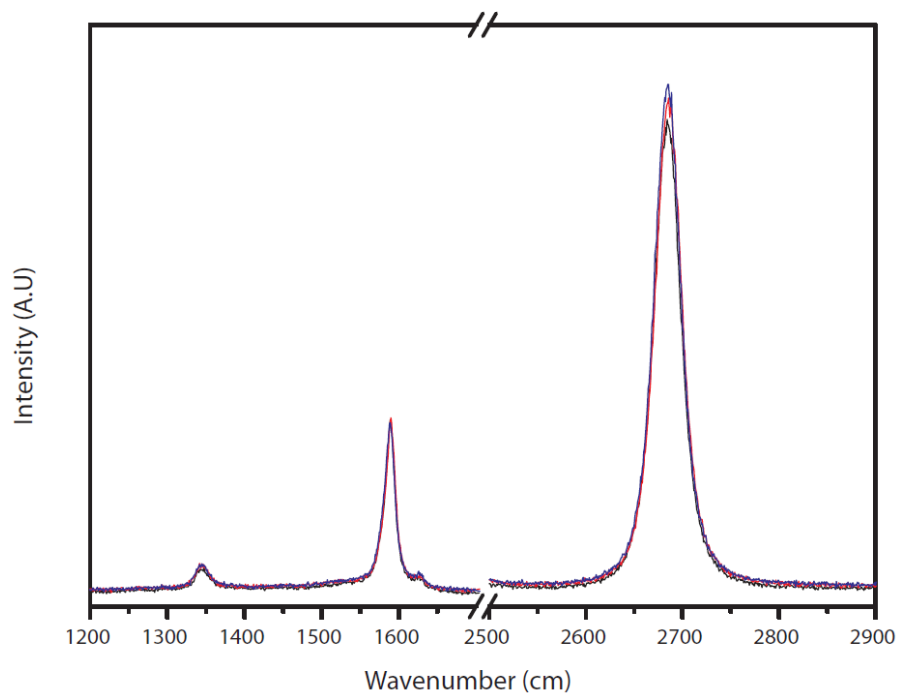

**Figure S5.** Three representative Raman spectra plotted for different regions of graphene transferred on SiO<sub>2</sub>/Si.

**Table S1.** Examples of contact resistance estimation for the PP and PLA fibers.  $R_{2p}$  is the two probe resistance calculated from the I-V curves, L and W are the length and width of the fiber samples.  $R_c = (R_{2p}^{Dev1} - \rho_G(L^{Dev1}/W^{Dev1}))/2$ , where  $\rho_G$  is the graphene resistivity,  $\rho_G = (R_{2p}^{Dev1} - R_{2p}^{Dev2})(L^{Dev1}/W^{Dev1} - L^{Dev2}/W^{Dev2})^{-1}$ .

| Fiber type | Device no. | $R_{2p}$ ( $\Omega$ ) | L (mm) | W (mm) | $R_c$ ( $\Omega$ ) |
|------------|------------|-----------------------|--------|--------|--------------------|
| PP         | Dev1       | 26502.87              | 93     | 16     | 1023.915           |
|            | Dev2       | 10199.51              | 31     | 16     |                    |
| PLA        | Dev1       | 18278.8082            | 45     | 12     | 720.8412           |
|            | Dev2       | 31000.1922            | 79     | 12     |                    |
